# Supplementary material for: Global burden of deaths from Epstein-Barr virus attributable malignancies 1990-2010
Source: PubMed Central journal article supplement (PMC4253616; doi:10.1186/1750-9378-9-38), 2014-11-17

**SUPPLEMENTARY INFORMATION**

**Supplementary Figure S1 - Global burden of death from EBV-attributed malignancies in 2010 by region**

**(A) Gastric cancer**

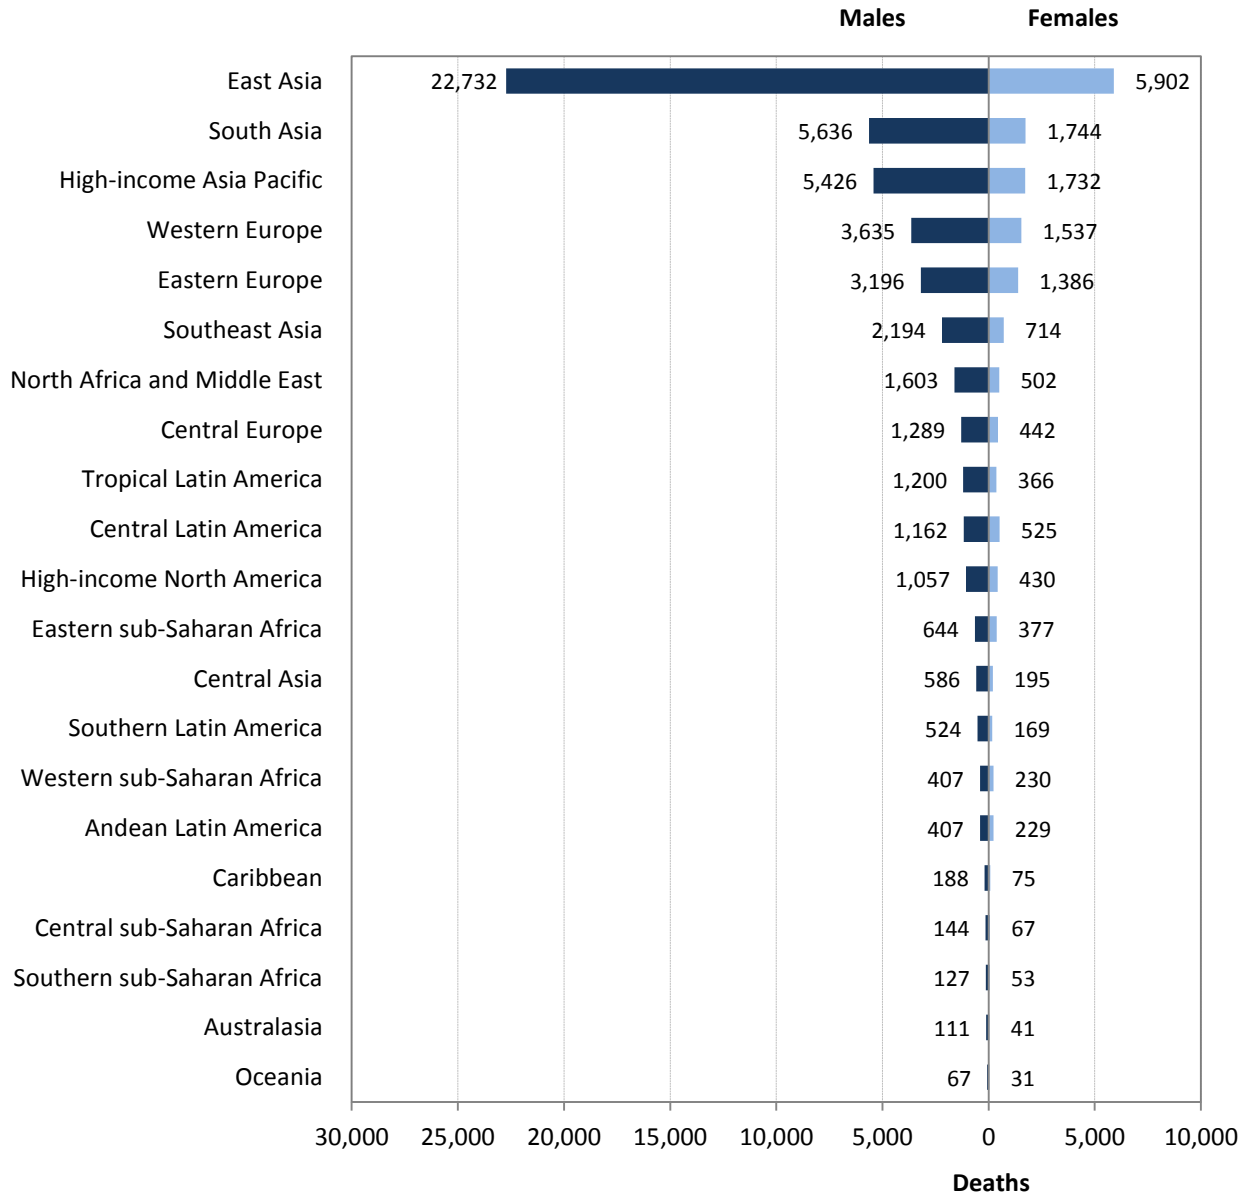

**(B) Nasopharyngeal carcinoma**

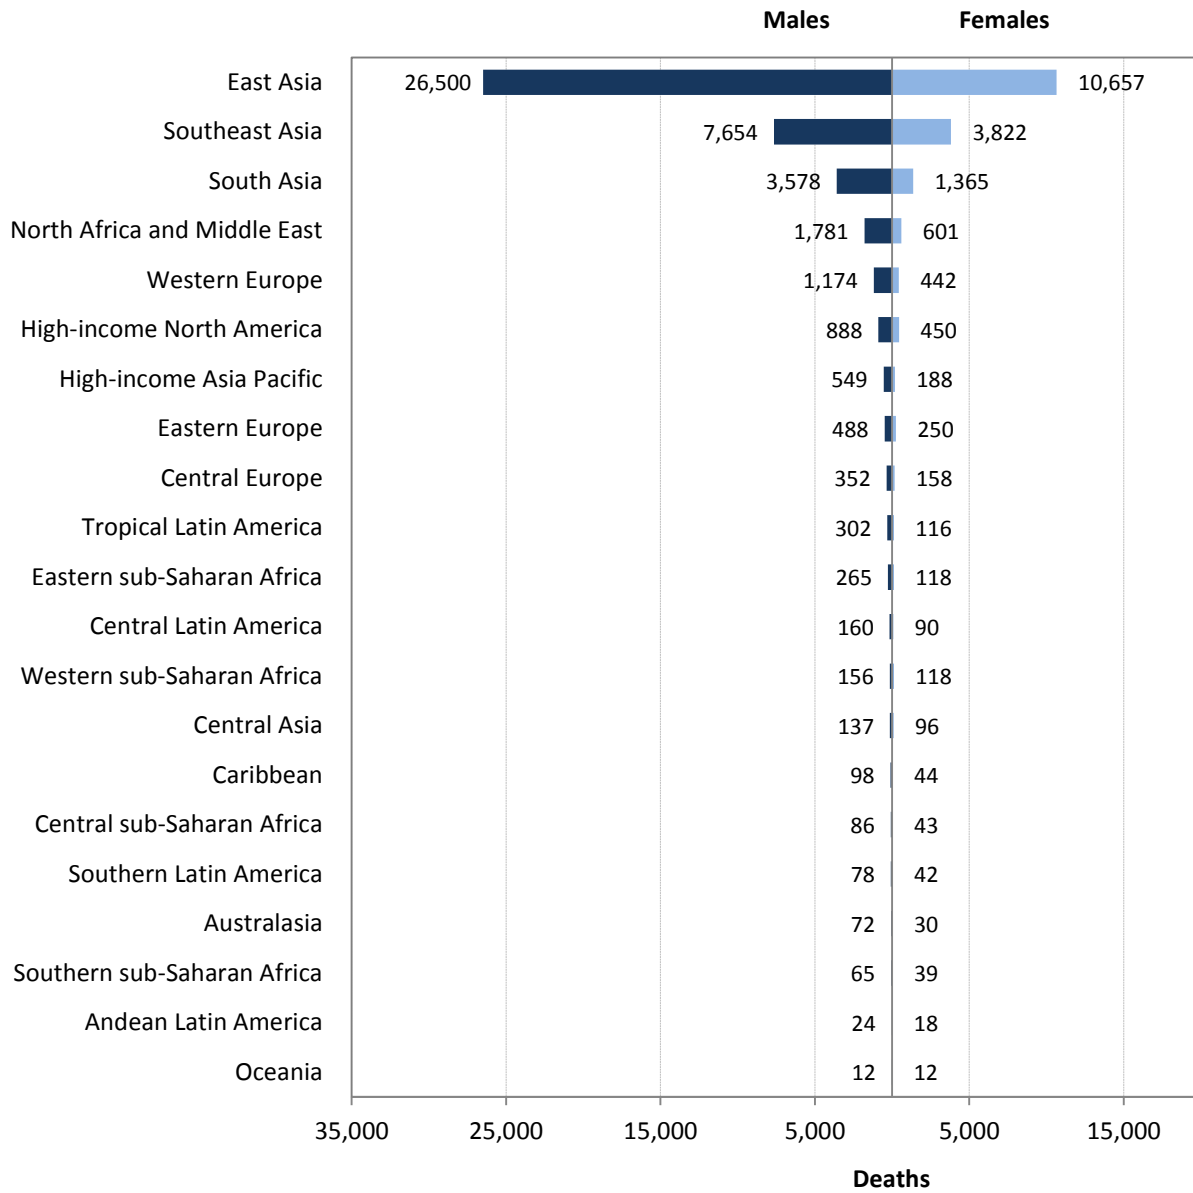

**(C) Hodgkin's lymphoma**

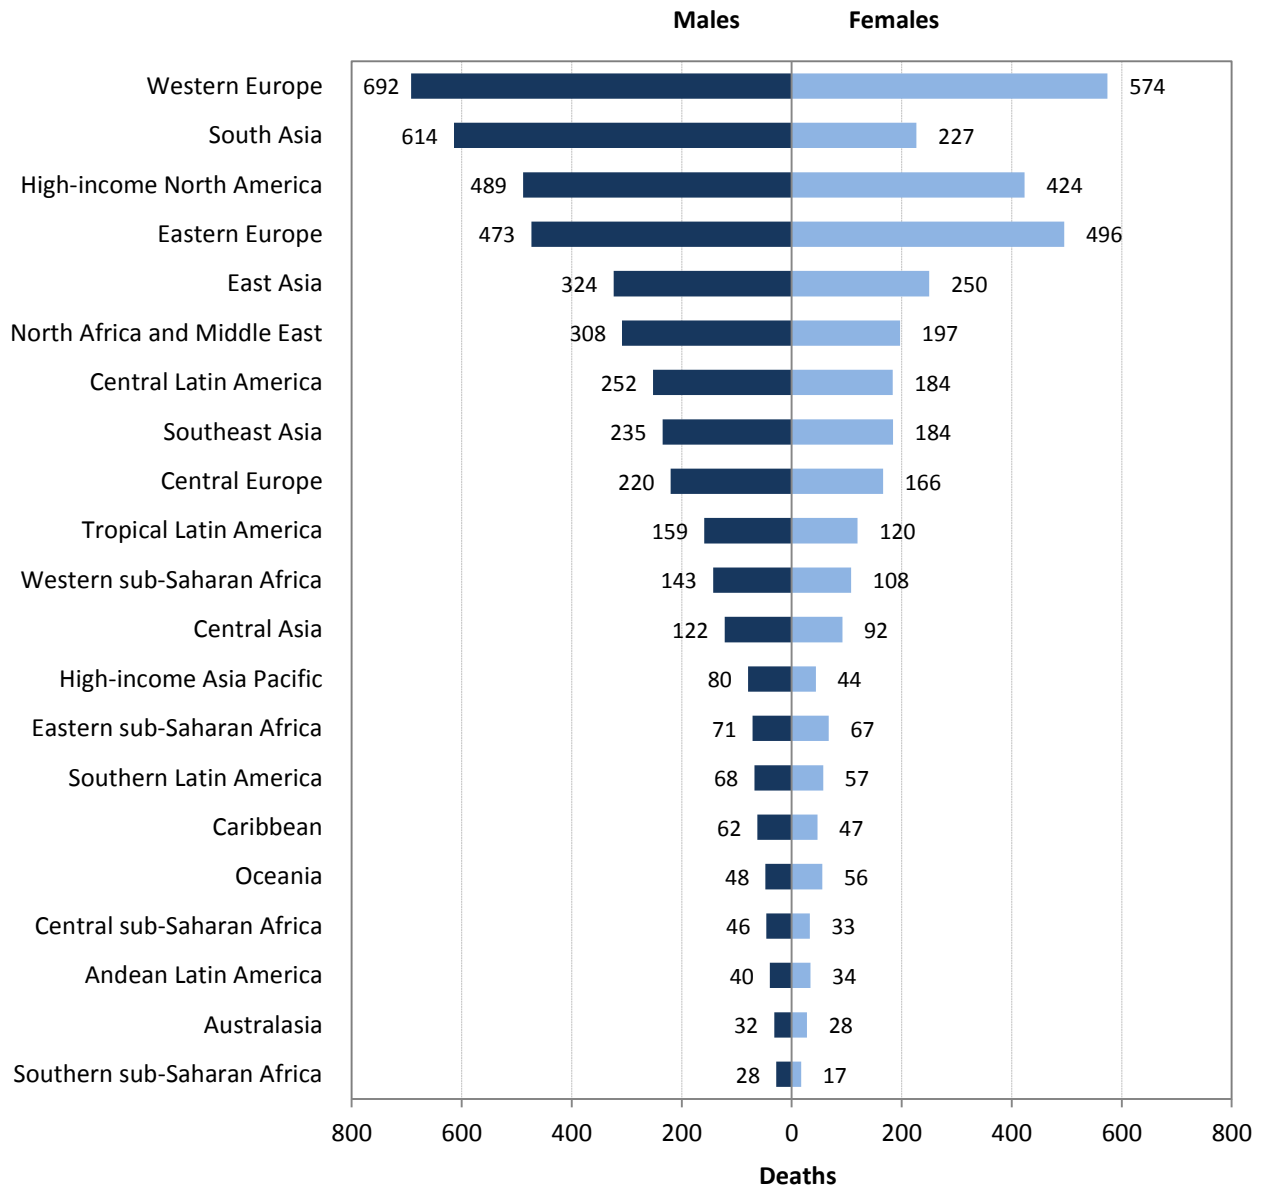

**(D) Burkitt's lymphoma**

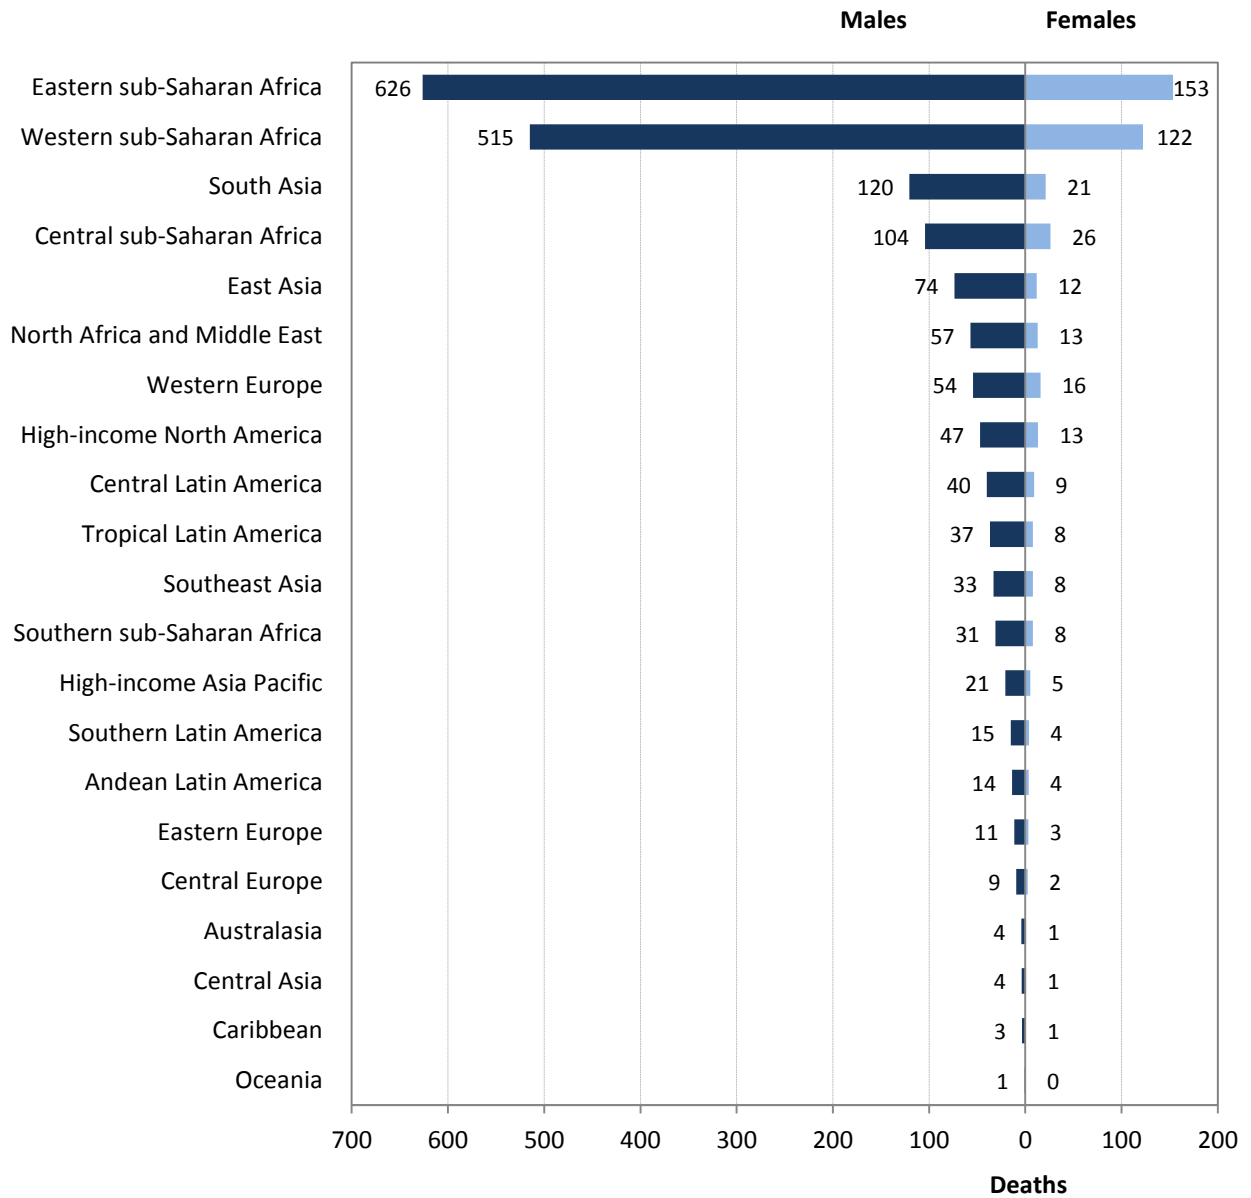

Supplement: 13027_2014_508_MOESM1_ESM.pdf [file 13027_2014_508_MOESM1_ESM.pdf]
